# Supplementary material
Source: PubMed Central journal article supplement (PMC5474779)
Supplement: pnas.1702560114.sapp.pdf [file pnas.1702560114.sapp.pdf]

## Supporting information

### RNA-Seq reveals conservation of function among the yolk sacs of human, mouse and chicken

Tereza Cindrova-Davies, Eric Jauniaux, Michael Elliot, Sungsam Gong, Graham J Burton, D. Stephen Charnock-Jones

#### Methods

**Proteomics.** 1D gel lanes were cut into 8 bands and each band was transferred into a 96-well PCR plate. The bands were cut into 1mm<sup>2</sup> pieces, destained, reduced (DTT) and alkylated (iodoacetamide) and subjected to enzymatic digestion with trypsin overnight at 37°C. After digestion, the supernatant was pipetted into a sample vial and loaded onto an autosampler for automated LC-MS/MS analysis.

All LC-MS/MS experiments were performed using a Dionex Ultimate 3000 RSLC nanoUPLC (Thermo Fisher Scientific Inc, Waltham, MA, USA) system and a QExactive Orbitrap mass spectrometer (Thermo Fisher Scientific Inc, Waltham, MA, USA). Separation of peptides was performed by reverse-phase chromatography at a flow rate of 300 nL/min and a Thermo Scientific reverse-phase nano Easy-spray column (Thermo Scientific PepMap C18, 2µm particle size, 100Å pore size, 75µm i.d. x 50cm length). Peptides were loaded onto a pre-column (Thermo Scientific PepMap 100 C18, 5µm particle size, 100Å pore size, 300µm i.d. x 5mm length) from the Ultimate 3000 autosampler with 0.1% formic acid for 3 minutes at a flow rate of 10 µL/min. After this period, the column valve was switched to allow elution of peptides from the pre-column onto the analytical column. Solvent A was water + 0.1% formic acid and solvent B was 80% acetonitrile, 20% water + 0.1% formic acid. The linear gradient employed was 2-40% B in 30 minutes.

The LC eluant was sprayed into the mass spectrometer by means of an Easy-Spray source (Thermo Fisher Scientific Inc.). All *m/z* values of eluting ions were measured in an Orbitrap mass analyzer, set at a resolution of 70000 and was scanned between *m/z* 380-1500. Data dependent scans (Top 20) were employed to automatically isolate and generate fragment ions by higher energy collisional dissociation (HCD, NCE:25%) in the HCD collision cell and measurement of the resulting fragment ions was performed in the Orbitrap analyser, set at a resolution of 17500. Singly charged ions and ions with unassigned charge states were excluded from being selected for MS/MS and a dynamic exclusion window of 20 seconds was employed.

Post-run, the data was processed using Protein Discoverer (version 1.4., ThermoFisher). Briefly, all MS/MS data were converted to mgf files and the files were then submitted to the Mascot search algorithm (Matrix Science, London UK) and searched against the UniProt human database (153168 sequences; 54677058 residues). Variable modifications of oxidation (M) and deamidation (NQ) and a fixed modification of carbamidomethyl (C) were

applied and the peptide and fragment mass tolerances were set to 5ppm and 0.1 Da, respectively. A significance threshold value of  $p < 0.05$  and a peptide cut-off score of 20 were also applied. All the Mascot data from each lane was merged to give a single output file. Finally, Mascot .dat files were entered into the Scaffold software (Proteome Software, Oregon USA) so that differences between the two protein samples could be compared.

Two samples had very few recognizable peptide hits these samples were excluded from the subsequent analysis. Unique hits to identifiable proteins were counted and those with the same gene name in the identifier field combined. The corresponding gene names for the proteins detected in 4 out of the 5 samples were used in Gene Ontology analysis as described below (Panther).

## **Bioinformatic analysis**

### **RNA-Seq data processing**

Quality assessment and trimming of the de-multiplex reads was carried out using FastQC and cutadapt respectively (<http://www.bioinformatics.babraham.ac.uk/projects/fastqc>(1). The trimmed short reads were mapped to the human reference genome (hg19) using TopHat2 (version 2.0.12), a splice-aware mapper(2). Uniquely mapped reads were counted using HTSeq (version 0.6.0)(3) and the relative transcript abundance determined using DESeq2 (version 1.6.3)(4).

### **Other datasets**

To compare the levels of transcripts in the yolk sac and placental villi with those in the liver, lung and kidney processed RNA-Seq data was downloaded from the EBI Expression Atlas (version: 0.1.4-SNAPSHOT, experiment E-MTAB-513 <http://www.ebi.ac.uk/gxa/experiments/E-MTAB-513?ref=aebrowse>).

To compare with 27 other tissues processed RNA-Seq data was downloaded from Expression Atlas - E-MTAB-1733 (<http://www.ebi.ac.uk/arrayexpress/experiments/E-MTAB-1733>)(5).

### **GO analysis**

The most abundant 400 transcripts in the tissues of interest were identified (ranked by mean RPKM) and gene ontology analyzed by using Panther(6) (<http://pantherdb.org> release 20160715). The complete Panther data base was used to include the mitochondrially encoded transcripts. The Biological Process, Molecular Function and Cellular Component were all analyzed. The reference sets were all Homo sapiens or Mus musculus genes (known in Panther) and the Bonferroni correction for multiple testing was applied in all cases.

Chord plots of enriched GO terms (Figure 1 for example) were generated in R using GOplot (v 1.0.2, available from CRAN) (7).

### **Venn diagrams**

Venn diagrams were generated in R (vennCounts and VennDiagram, within the Bioconductor limma package) and the p-values for the observed overlaps calculated with SuperExactTest by Wang et al 2015 (v 0.99.2, available from CRAN)(8).

## **Transcription factor binding sites**

Within the most abundant 400 transcripts in the human yolk sac, 19 genes are annotated as "regulation of transcription, DNA-templated" (GO:0006355) including several transcription factors (ATF4, FOS, FOSB, JUN, JUNB and JUND XBP-1 and BHLHE40). In the mouse 8 genes were similarly annotated (Table S3.)

The correlation (Spearman) between each of the transcripts encoding these transcription factors and all other yolk sac transcripts (rpkm >15) was calculated. The transcripts with rho >0.8 were identified. Over-represented transcription factor binding motifs in these genes were identified (JASPAR2016 and TFBSTools). Candidate motifs recognized by the transcription factors (or family for JUN and FOS) were enriched in the 1kb and 5kb upstream of the TSS of the highly correlated genes. Regions of interest were extracted using Biostrings and transcription factor binding motifs identified using JASPAR2016 and TFBSTools, all in R. P values were corrected for multiple testing(9) (Datasets S7 & 8).

Similar analysis was carried out for the mouse data in which 8 genes were annotated as above. Atf4 was the only transcription factor with a binding motif in the JASPAR2016 database. Candidate motifs recognized by Atf4 were enriched in the 1kb and 5kb upstream of the TSS of the highly correlated genes (Datasets S9 &10).

Other manipulations were carried out in R (BiomaRt, dplyr and made4) and Excel.

## **Results**

### **Sample quality control**

Hierarchical clustering of the yolk sac reads indicated that 1 sample did not cluster with any other sample and formed a separate branch. This sample had extremely high levels of villous specific transcripts (CGA, CGB, CGB5, CGB8, PSG1, PSG2, PSG3, PSG4, PSG9, LEP, KISS1 and CSH2; for example CGA ~73,000 vs a mean of ~320 for the other samples). It is therefore likely that the sample is contaminated with villous material. This sample was removed and the level of these transcripts examined in the remaining samples. Two additional samples had markedly different levels of these transcripts and so were also excluded from subsequent analysis.

RNASeq data from the first trimester villus samples were similarly processed and 1 sample clustered alone as a well separated branch. This sample had higher levels of decidual transcripts (such as IGF2, IGFPB4, IGFPB5, IGFPB7 and low levels of villous transcripts (CGA, CGB, CGB5, LEP and KISS1). This sample was therefore excluded from subsequent analysis.

A similar approach was adopted with the mouse yolk sac samples and 1 sample clustered as a well-separated branch. This sample had much lower levels of the fetal hemoglobin transcripts (Hbb-y, Hbb-bh1 and Hba-x) whereas these were the most abundant in all the other samples. This sample was therefore excluded from subsequent analysis.

## Mitochondrial transcripts

Various enriched GO terms are associated with mitochondrial activity (“mitochondrial respiratory chain complex”, and “mitochondrial ATP synthesis coupled electron transport” for example). This is consistent with the previously reported high density of mitochondria in the yolk sac(10). We calculated the proportion of transcripts present that were encoded by the mitochondrial genome (Figure S1). The fractions for the yolk sac and first trimester villi are slightly above the average and these data are consistent with that showing the kidney and heart had the highest mitochondrial fractions(11).

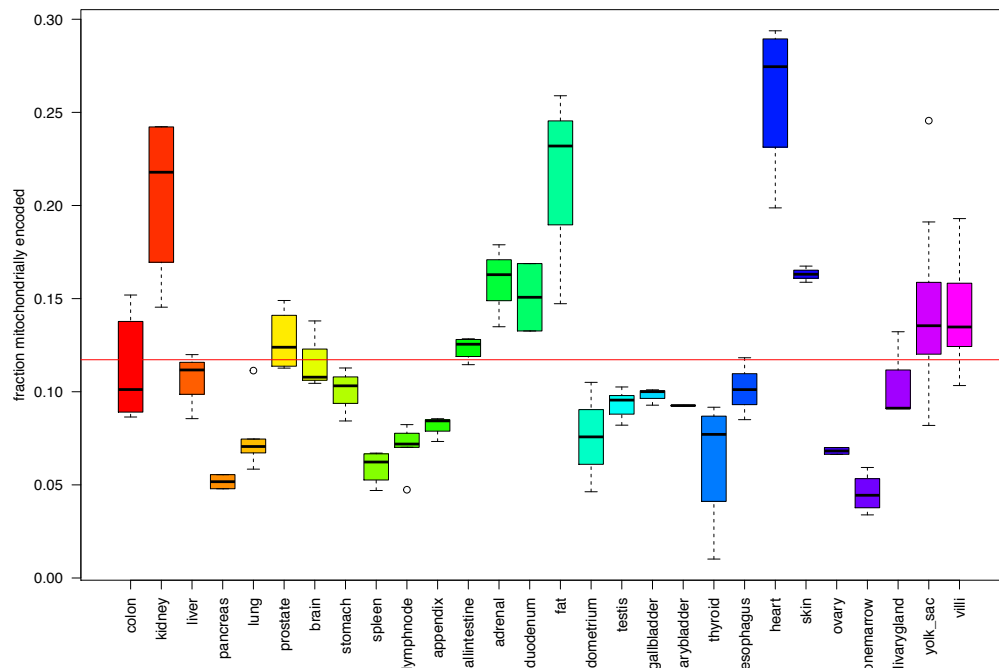

**Figure S1.** The fraction of mitochondrially encoded transcripts in each tissue type is the proportion mitochondrial genes over the sum over all RPKM values in that tissue

Mitochondrially encoded transcripts directly involved in the electron transfer chain and (or) energy generation were highly correlated with each other (Spearman’s rho >0.71) and not with other transcripts in the most abundant 400 (Datasets S6). One other transcript was correlated with these (HNRNPA2B1). Other mitochondrially encoded transcripts (12S and 16S rRNA) were not similarly correlated.

## Comparison with other tissues.

We used hierarchical clustering to examine the relationships among the expression patterns of the most variable transcripts detected at rpkms  $\geq 0.1$  in the yolk sac, placental villi and a range of other tissues. As previously reported, clustering recapitulated the origin of the tissue(5). The first trimester placental villi and the term placental samples clustered together with the yolk sac cluster forming an adjacent branch (Figure S2). This indicates the first and third trimester villi have similar transcript profiles and the 3 extra-embryonic tissues are more similar to each other than to the other tissues examined. The yolk sac samples form 2 closely linked branches, and on closer inspection of the samples falling in these 2 groups, we noted

a marked difference in the level of transcripts encoding ALB, AFP, HBE, HBZ. It is known from previous studies that the size of the yolk sac declines from a maximum diameter of ~6mm at approximately 10 weeks gestation (12). The gestational age of the samples used in this study is only available for a subset of the samples. However, for those where this is known the samples obtained earlier in gestation (7+0, 8+2, 9+0 and 9+2) are on a separate branch to the known later sample (11+0). Male and female samples are distributed evenly across both branches.

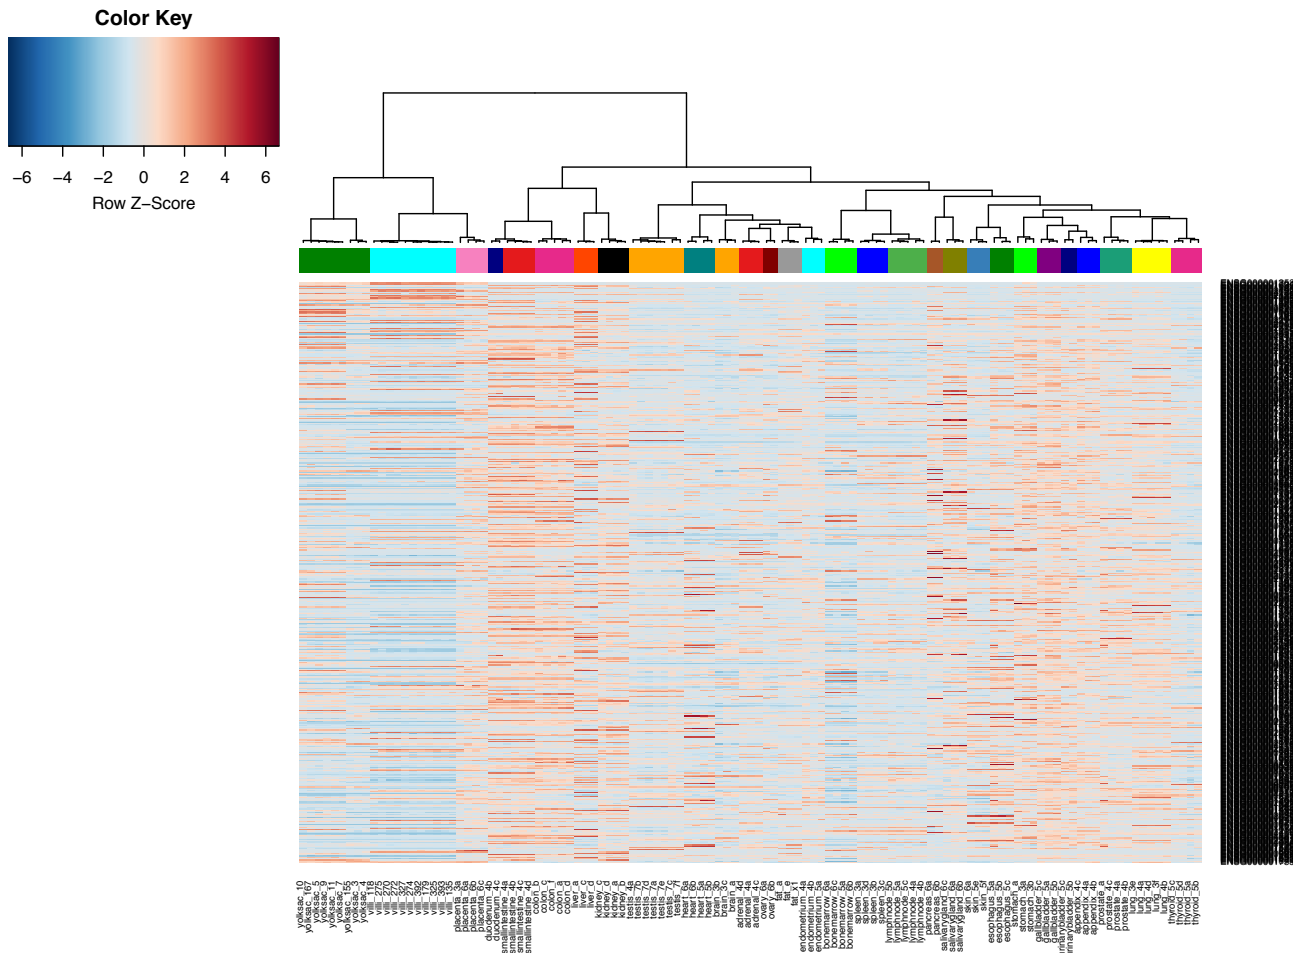

**Figure S2.** Hierarchical clustering of multiple tissues based on the 500 transcripts with the highest standard deviation(5).

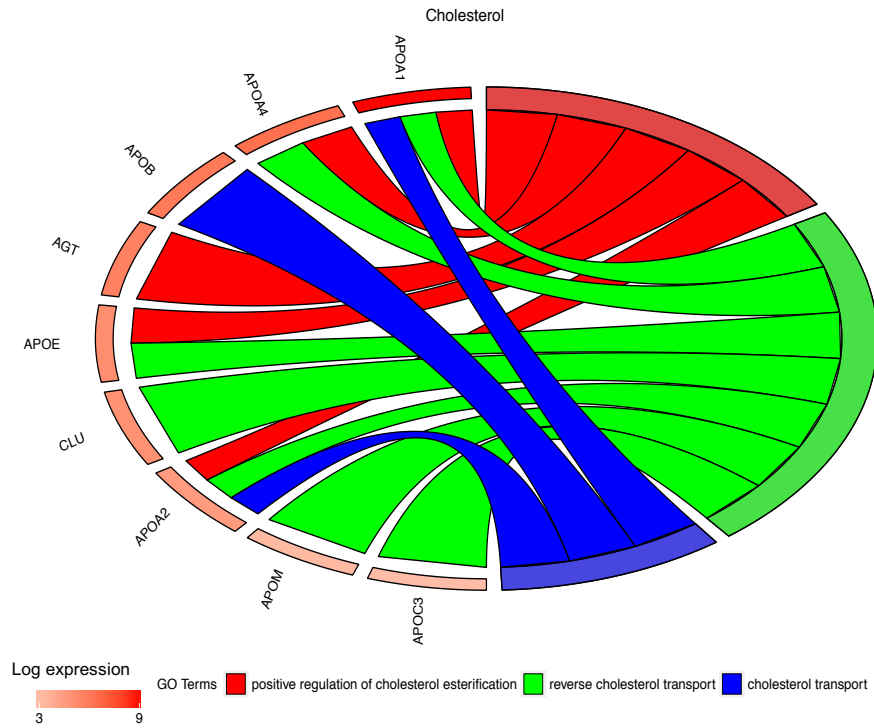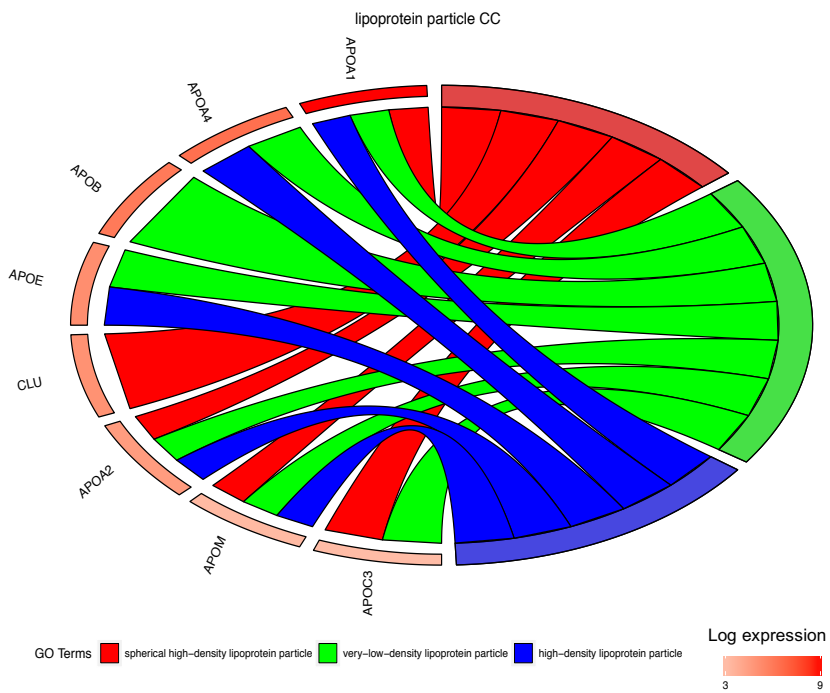

**Figure S3 a & b.**

Chord plots illustrating the proteins annotated with the GO molecular function and cellular components “cholesterol” and “lipoprotein particle” respectively are present coelomic fluid.

**Table S1**

| Human Yolk sac |            | Human first trimester villi |             | Mouse yolk sac |            |
|----------------|------------|-----------------------------|-------------|----------------|------------|
| Sample ID      | Reads      | Sample ID                   | Reads       | Sample ID      | Reads      |
| YS167          | 48,834,289 | P270                        | 4,058,853   | B6YS1.2        | 36,961,551 |
| YS7            | 63,379,887 | P325                        | 23,438,297  | B6YS3.1        | 16,745,203 |
| YS9            | 58,695,200 | P392                        | 12,959,581  | B6YS9.1        | 24,340,906 |
| YS10           | 65,310,562 | P393                        | 58,672,011  | B6YS10.1       | 15,963,038 |
| YS11           | 37,760,671 | P118                        | 76,386,477  | B6YS11.1       | 64,903,212 |
| YS3            | 39,471,048 | P272                        | 205,189,675 | B6YS24.1       | 20,101,598 |
| YS4            | 28,688,319 | P274                        | 30,427,351  | B6YS27.1       | 32,624,089 |
| YS5            | 33,224,068 | P275                        | 131,727,903 | B6YS28.1       | 36,481,077 |
| YS155          | 39,022,547 | P179                        | 22,238,388  |                |            |
|                |            | P327                        | 89,441,895  |                |            |
| median         | 39,471,048 | median                      | 30,427,351  | median         | 28,482,498 |

Summary of the number of RNASeq reads (single-end 50base) obtained for the human and mouse yolk sacs and the first trimester human placental villi.

**Table S2**

|                                      |                                                                                                                                                                                                                                                                                                                                                                                                                                                                                                                                                                                                                                                                                                                                                                                                                                                      |
|--------------------------------------|------------------------------------------------------------------------------------------------------------------------------------------------------------------------------------------------------------------------------------------------------------------------------------------------------------------------------------------------------------------------------------------------------------------------------------------------------------------------------------------------------------------------------------------------------------------------------------------------------------------------------------------------------------------------------------------------------------------------------------------------------------------------------------------------------------------------------------------------------|
| Common circulating blood proteins    | <b>Serum albumin</b> , Afamin (albumin family, vit E-binding), Ig ( $\kappa$ C, $\gamma$ -1,-2, $\lambda$ , V-II, V-III), <b>Apolipoproteins (A-I, A-II, A-IV, B, B100, D, E, M)</b> , clusterin (apolipoprotein J), <b>heparan sulfate proteoglycan (basement-membrane-specific)</b> , $\alpha$ -2-macroglobulin, Hemopexin ( $\beta$ -1B-glycoprotein), $\alpha$ -1B-glycoprotein, <b><math>\alpha</math>-2-HS-glycoprotein</b> , <b><math>\alpha</math>-1-acid glycoprotein</b> , <b>Gelsolin</b> , <b>Fibrinogen <math>\alpha</math></b> , Vitronectin, <b>Zinc-<math>\alpha</math>-2-glycoprotein</b> , Histidine-rich glycoprotein, <b><math>\beta</math>-2-microglobulin</b> , <b><math>\alpha</math>-1-acid glycoprotein</b> , <b>Leucine-rich <math>\alpha</math>-2-glycoprotein</b> , $\beta$ -2-glycoprotein 1, Serum amyloid A-4 protein |
| Coagulation and complement factors   | <b>Complement (B, C3, C4, C7, C9, D, H, I)</b> , Kininogen, <b>Coagulation factors (V, XII)</b>                                                                                                                                                                                                                                                                                                                                                                                                                                                                                                                                                                                                                                                                                                                                                      |
| Blood transport and binding proteins | Serotransferrin, Ceruloplasmin, <b>Transthyretin</b> , <b>Vitamin D-binding protein</b> , <b>Retinol-binding protein</b> , Galectin-3-binding protein, Latent-transforming growth factor beta-binding protein, Phospholipid transfer protein, <b>Hemoglobin (<math>\alpha</math>, <math>\beta</math>, <math>\epsilon</math>, <math>\zeta</math>)</b> , <b>Thyroxine-binding globulin</b> , Insulin-like growth factor-binding protein 3, <b>Latent-transforming growth factor <math>\beta</math>-binding protein</b> , <b>Corticosteroid-binding globulin</b>                                                                                                                                                                                                                                                                                        |
| Protease inhibitors                  | <b><math>\alpha</math>-1-antitrypsin</b> , Antithrombin-III, <b><math>\alpha</math>-1-antichymotrypsin</b> , <b>Inter-<math>\alpha</math>-trypsin inhibitor</b> , <b>Plasma protease C1 inhibitor</b> , <b>Inter-<math>\alpha</math>-trypsin inhibitor</b> , $\alpha$ -2-antiplasmin, Cystatin c (potent inhibitor of lysosomal proteinases), <b>Heparin cofactor 2</b> (rapidly inhibits thrombin in the presence of dermatan sulfate or heparin), inhibits trypsin, plasmin, and lysosomal granulocytic elastase), Metalloproteinase inhibitor 1                                                                                                                                                                                                                                                                                                   |

|                                          |                                                                                                                                                                                                                                                                                                                                                                                                                                                                                                                                                                                                                                                              |
|------------------------------------------|--------------------------------------------------------------------------------------------------------------------------------------------------------------------------------------------------------------------------------------------------------------------------------------------------------------------------------------------------------------------------------------------------------------------------------------------------------------------------------------------------------------------------------------------------------------------------------------------------------------------------------------------------------------|
| Proteases and other enzymes              | <b>Plasminogen, angiotensinogen</b> , Procollagen C-endopeptidase enhancer, Glutathione peroxidase, Prothrombin, Cu-Zn superoxide dismutase,                                                                                                                                                                                                                                                                                                                                                                                                                                                                                                                 |
| Cytokines and hormones                   | $\alpha$ -fetoprotein, Pigment epithelium-derived factor (serpin 1), Choriogonadotropin subunit $\beta$                                                                                                                                                                                                                                                                                                                                                                                                                                                                                                                                                      |
| Channel and receptor-derived peptides    |                                                                                                                                                                                                                                                                                                                                                                                                                                                                                                                                                                                                                                                              |
| Miscellaneous (structural, nuclear etc.) | Fibronectin, Fibulin-1, Decorin (proteoglycan), <b>Collagens-<math>\alpha</math>1, -2, -3</b> , Laminin, Versican core protein, Periostin, <b>Keratins (I, II)</b> , Transforming growth factor- $\beta$ -induced protein, Lumican (proteoglycan), Laminin ( $\beta$ 1, $\gamma$ 1), glycodeilin, Hyaluronan and proteoglycan link protein, nidogen-1 (entactin, basement memb), titin (striated muscle contraction), actin, Fibulin-2, Osteonectin (SPARC, a glycoprotein in the bone that binds calcium), Spondin-1 (axon guidance), Extracellular matrix protein 1, Dystroglycan (dystrophin-associated glycoprotein), Cadherin-1 (transmembrane protein) |

Proteins in **bold** are also reported in human serum

Categorization of the proteins detected in the human coelomic fluid and comparison with serum proteins

**Table S3**

**Human**

| ensembl gene id | hgnc symbol | description                                                                                   | GO linkage type |
|-----------------|-------------|-----------------------------------------------------------------------------------------------|-----------------|
| ENSG00000065978 | YBX1        | Y box binding protein 1                                                                       | IDA             |
| ENSG00000128272 | ATF4        | activating transcription factor 4                                                             | IEA, ISS        |
| ENSG00000145741 | BTF3        | basic transcription factor 3                                                                  | IEA             |
| ENSG00000009307 | CSDE1       | cold shock domain containing E1, RNA-binding eukaryotic translation elongation factor 1 alpha | IEA             |
| ENSG00000156508 | EEF1A1      | 1<br>FBJ murine osteosarcoma viral oncogene                                                   | IEA             |
| ENSG00000170345 | FOS         | homolog                                                                                       | IEA             |
| ENSG00000152795 | HNRNPDL     | heterogeneous nuclear ribonucleoprotein D-like                                                | IEA             |
| ENSG00000171223 | JUNB        | jun B proto-oncogene                                                                          | IEA             |
| ENSG00000130522 | JUND        | jun D proto-oncogene                                                                          | IEA             |
| ENSG00000177606 | JUN         | jun proto-oncogene                                                                            | IEA             |
| ENSG00000107438 | PDLIM1      | PDZ and LIM domain 1                                                                          | IEA             |
| ENSG00000177469 | PTRF        | polymerase I and transcript release factor                                                    | IEA             |
| ENSG00000149273 | RPS3        | ribosomal protein S3                                                                          | IEA             |
| ENSG00000179218 | CALR        | calreticulin                                                                                  | TAS             |
| ENSG00000169714 | CNBP        | CCHC-type zinc finger, nucleic acid binding protein                                           | TAS             |
| ENSG00000107223 | EDF1        | endothelial differentiation-related factor 1                                                  | TAS             |
| ENSG00000089009 | RPL6        | ribosomal protein L6                                                                          | TAS             |



|                 |         |                                              |     |
|-----------------|---------|----------------------------------------------|-----|
| ENSG00000134107 | BHLHE40 | basic helix-loop-helix family, member e40    | NAS |
| ENSG00000167244 | IGF2    | insulin-like growth factor 2 (somatomedin A) | NAS |

### Mouse

| ensembl gene id    | mgj<br>symbol | description                                                | GO linkage<br>type |
|--------------------|---------------|------------------------------------------------------------|--------------------|
| ENSMUSG00000042406 | Atf4          | activating transcription factor 4                          | IDA, IMP           |
| ENSMUSG00000006932 | Ctnnb1        | catenin (cadherin associated protein), beta 1              | IDA                |
| ENSMUSG00000020267 | Hint1         | histidine triad nucleotide binding protein 1               | IEA, ISS, ISO      |
| ENSMUSG00000028639 | Ybx1          | Y box protein 1                                            | IEA, ISS, ISO      |
| ENSMUSG00000021660 | Btf3          | basic transcription factor 3                               | IEA                |
| ENSMUSG00000051223 | Bzw1          | basic leucine zipper and W2 domains 1                      | IEA                |
| ENSMUSG00000050966 | Lin28a        | lin-28 homolog A (C. elegans)                              | IEA                |
| ENSMUSG00000055839 | Tceb2         | transcription elongation factor B (SIII),<br>polypeptide 2 | IEA                |

Table of the genes annotated with the GO term "regulation of transcription, DNA-templated" (GO:0006355) in the most abundant human and mouse yolk sac transcripts. GO evidence codes (go\_linkage\_type) are also provided (see <http://geneontology.org/page/guide-go-evidence-codes>)

**Table S4**

| <b>BP</b>  | <b>BP description</b>                          | <b>MF</b>  | <b>MF description</b>              | <b>CC</b>  | <b>CC description</b>           |
|------------|------------------------------------------------|------------|------------------------------------|------------|---------------------------------|
| GO:0006364 | rRNA processing                                | GO:0003676 | nucleic acid binding               | GO:0000323 | lytic vacuole                   |
| GO:0006412 | translation                                    | GO:0003723 | RNA binding                        | GO:0005575 | cellular_component              |
| GO:0006518 | peptide metabolic process                      | GO:0003735 | structural constituent of ribosome | GO:0005576 | extracellular region            |
| GO:0006807 | nitrogen compound metabolic process            | GO:0005198 | structural molecule activity       | GO:0005615 | extracellular space             |
| GO:0008152 | metabolic process                              | GO:0005488 | binding                            | GO:0005622 | intracellular                   |
| GO:0009058 | biosynthetic process                           | GO:0016491 | oxidoreductase activity            | GO:0005623 | cell                            |
| GO:0009059 | macromolecule biosynthetic process             | GO:0019843 | rRNA binding                       | GO:0005730 | nucleolus                       |
| GO:0009123 | nucleoside monophosphate metabolic process     | GO:0044822 | poly(A) RNA binding                | GO:0005737 | cytoplasm                       |
| GO:0009161 | ribonucleoside monophosphate metabolic process | GO:0097159 | organic cyclic compound binding    | GO:0005739 | mitochondrion                   |
| GO:0009987 | cellular process                               | GO:1901363 | heterocyclic compound binding      | GO:0005740 | mitochondrial envelope          |
| GO:0010467 | gene expression                                |            |                                    | GO:0005746 | mitochondrial respiratory chain |
| GO:0016072 | rRNA metabolic process                         |            |                                    | GO:0005764 | lysosome                        |
| GO:0019538 | protein metabolic process                      |            |                                    | GO:0005773 | vacuole                         |
| GO:0022613 | ribonucleoprotein complex biogenesis           |            |                                    | GO:0005829 | cytosol                         |
| GO:0034641 | cellular nitrogen compound metabolic process   |            |                                    | GO:0005840 | ribosome                        |
| GO:0034645 | cellular macromolecule biosynthetic process    |            |                                    | GO:0005912 | adherens junction               |

|            |                                                 |            |                                         |
|------------|-------------------------------------------------|------------|-----------------------------------------|
| GO:0042254 | ribosome biogenesis                             | GO:0005924 | cell-substrate adherens junction        |
| GO:0042255 | ribosome assembly                               | GO:0005925 | focal adhesion                          |
| GO:0043043 | peptide biosynthetic process                    | GO:0015934 | large ribosomal subunit                 |
| GO:0043603 | cellular amide metabolic process                | GO:0015935 | small ribosomal subunit                 |
| GO:0043604 | amide biosynthetic process                      | GO:0016020 | membrane                                |
| GO:0044085 | cellular component biogenesis                   | GO:0022625 | cytosolic large ribosomal subunit       |
| GO:0044237 | cellular metabolic process                      | GO:0022626 | cytosolic ribosome                      |
| GO:0044238 | primary metabolic process                       | GO:0022627 | cytosolic small ribosomal subunit       |
| GO:0044249 | cellular biosynthetic process                   | GO:0030054 | cell junction                           |
| GO:0044267 | cellular protein metabolic process              | GO:0030055 | cell-substrate junction                 |
| GO:0044271 | cellular nitrogen compound biosynthetic process | GO:0030529 | intracellular ribonucleoprotein complex |
| GO:0044281 | small molecule metabolic process                | GO:0031090 | organelle membrane                      |
| GO:0044710 | single-organism metabolic process               | GO:0031966 | mitochondrial membrane                  |
| GO:0055114 | oxidation-reduction process                     | GO:0031982 | vesicle                                 |
| GO:0065003 | macromolecular complex assembly                 | GO:0031988 | membrane-bounded vesicle                |
| GO:0071704 | organic substance metabolic process             | GO:0032991 | macromolecular complex                  |
| GO:1901564 | organonitrogen compound metabolic process       | GO:0043226 | organelle                               |

|            |                                                    |            |                                                                                             |
|------------|----------------------------------------------------|------------|---------------------------------------------------------------------------------------------|
| GO:1901566 | organonitrogen<br>compound biosynthetic<br>process | GO:0043227 | membrane-bounded organelle                                                                  |
| GO:1901576 | organic substance<br>biosynthetic process          | GO:0043228 | non-membrane-bounded organelle                                                              |
|            |                                                    | GO:0043229 | intracellular organelle                                                                     |
|            |                                                    | GO:0043230 | extracellular organelle                                                                     |
|            |                                                    | GO:0043231 | intracellular membrane-bounded organelle<br>intracellular non-membrane-bounded<br>organelle |
|            |                                                    | GO:0043232 | organelle                                                                                   |
|            |                                                    | GO:0044391 | ribosomal subunit                                                                           |
|            |                                                    | GO:0044421 | extracellular region part                                                                   |
|            |                                                    | GO:0044422 | organelle part                                                                              |
|            |                                                    | GO:0044424 | intracellular part                                                                          |
|            |                                                    | GO:0044444 | cytoplasmic part                                                                            |
|            |                                                    | GO:0044445 | cytosolic part                                                                              |
|            |                                                    | GO:0044446 | intracellular organelle part                                                                |
|            |                                                    | GO:0044455 | mitochondrial membrane part                                                                 |
|            |                                                    | GO:0044464 | cell part                                                                                   |
|            |                                                    | GO:0070062 | extracellular exosome                                                                       |
|            |                                                    | GO:0070161 | anchoring junction                                                                          |
|            |                                                    | GO:0070469 | respiratory chain                                                                           |
|            |                                                    | GO:0098798 | mitochondrial protein complex<br>inner mitochondrial membrane protein<br>complex            |
|            |                                                    | GO:0098800 | complex                                                                                     |
|            |                                                    | GO:1903561 | extracellular vesicle                                                                       |

Over represented GO terms shared among the 400 most abundant transcripts in the human, mouse and chicken yolk sacs. BP, Biological process; MF molecular function and CC, Cellular component

## References

1. Martin M (2016) Cutadapt removes adapter sequences from high-throughput sequencing reads. 1–3 doi: 10.14806/ej.17.1.200.
2. Kim D, et al. (2013) TopHat2: accurate alignment of transcriptomes in the presence of insertions, deletions and gene fusions. *Genome Biol* 14(4):R36.
3. Anders S, Pyl PT, Huber W (2015) HTSeq—a Python framework to work with high-throughput sequencing data. *Bioinformatics* 31(2):166–169.
4. Love MI, Huber W, Anders S (2014) Moderated estimation of fold change and dispersion for RNA-seq data with DESeq2. *Genome Biol* 15(12):550.
5. Fagerberg L, et al. (2014) Analysis of the human tissue-specific expression by genome-wide integration of transcriptomics and antibody-based proteomics. *Mol Cell Proteomics* 13(2):397–406.
6. Mi H, Muruganujan A, Thomas PD (2013) PANTHER in 2013: modeling the evolution of gene function, and other gene attributes, in the context of phylogenetic trees. *Nucleic Acids Res* 41(Database issue):D377–86.
7. Walter W, Sánchez-Cabo F, Ricote M (2015) GOplot: an R package for visually combining expression data with functional analysis. *Bioinformatics* 31(17):2912–2914.
8. Wang M, Zhao Y, Zhang B (2015) Efficient Test and Visualization of Multi-Set Intersections. *Sci Rep* 5:16923.
9. Benjamini Y, Hochberg Y (1995) Controlling the False Discovery Rate: A Practical and Powerful Approach to Multiple Testing. *Journal of the Royal Statistical Society Series B* 57(1):289–300.
10. Pereda J, et al. (1994) The structure of the human yolk sac: a scanning and transmission electron microscopic analysis. *Arch Histol Cytol* 57(2):107–117.
11. Melé M, et al. (2015) Human genomics. The human transcriptome across tissues and individuals. *Science* 348(6235):660–665.
12. Jauniaux E, Jurkovic D, Henriët Y, Rodesch F, Hustin J (1991) Development of the secondary human yolk sac: correlation of sonographic and anatomical features. *Hum Reprod* 6(8):1160–1166.
